# Supplementary material
Source: PubMed Central journal article supplement (PMC3233487)
Supplement: cc1011_1845SD1.pdf [file cc1011_1845SD1.pdf]

**Supplementary Table S1.** Characteristics of the melanoma patient-derived cell lines.

| <b>Sample</b>   | <b>Gender/Age</b> | <b>BRAF 7q34 *</b> | <b>NRAS 1p13.2 *</b> |
|-----------------|-------------------|--------------------|----------------------|
| <b>Controls</b> |                   |                    |                      |
| NMADL RMP32F    | F/32              |                    |                      |
| NMADL RMP43F    | F/43              |                    |                      |
| NMADL RMP53F    | F/53              |                    |                      |
| <b>Melanoma</b> |                   |                    |                      |
| WW165           | F/62              | V600K/WT (AAG/GTG) | WT                   |
| YUBEL           | F/75              | WT                 | Q61K/WT AAA/CAA      |
| YUBUNE          | F/69              | WT                 | Q61R/WT CGA/CAA      |
| YUCAS           | M/58              | WT                 | WT                   |
| YUCHER          | M/55              | WT                 | Q61R CGA/CGA         |
| YUCLAT          | M/65              | V600K (AAG/AAG)    | WT                   |
| YUCOT           | F/33              | V600E (GAG/GAG)    | WT                   |
| YUDOSO          | M/84              | WT                 | Q61K/WT AAA/CAA      |
| YUFIC           | M/65              | WT                 | Q61R/WT CGA/CAA      |
| YUGASP          | F/88              | WT                 | Q61L CTA/CTA         |
| YUGEN8          | F/44              | V600E (GAG/GAG)    | WT                   |
| YUGOE           | M/55              | WT                 | WT                   |
| YUHEF           | M/52              | WT                 | WT                   |
| YUHEIK          | F/44              | WT                 | WT                   |
| YUHOIN          | F/59              | WT                 | WT                   |
| YUHUY           | M/64              | V600E (GAG/GAG)    | WT                   |
| YUKIM           | F/71              | WT                 | WT                   |
| YUKOLI          | M/53              | V600E/WT (GAG/GTG) | WT                   |
| YUKSI           | M/62              | V600K (AAG/AAG)    | WT                   |
| YULAC           | F/65              | V600K (AAG/AAG)    | WT                   |
| YULONE          | F/79              | WT                 | Q61K/WT CTA/CAA      |
| YUMAC           | M/52              | V600K (AAG/AAG)    | WT                   |
| YUMUT           | M/44              | V600E/WT (GTG/GAG) | WT                   |
| YUNIGE          | M/59              | WT                 | WT                   |
| YUPLA           | M/69              | WT                 | WT                   |
| YURIF           | M/52              | V600K (AAG/AAG)    | WT                   |
| YUROB           | F/76              | WT                 | WT                   |
| YUROL           | M/85              | WT                 | WT                   |
| YUSAN           | F/58              | WT                 | WT                   |
| YUSIK           | F/49              | V600E/WT (GAG/GTG) | WT                   |
| YUSIV           | F/61              | WT                 | WT                   |
| YUSTE           | F/65              | V600E (GAG/GAG)    | WT                   |
| YUTICA          | M/65              | WT                 | Q61R/WT CGA/CAA      |
| YUWIM           | 57/M              |                    |                      |
| YULIN           | 48/M              | WT                 | WT                   |
| YUDEW           | 68/F              |                    |                      |
| YUTHO           | 42/M              |                    |                      |
| <b>Acral</b>    |                   |                    |                      |
| YUVON3          | M/63              | WT                 | WT                   |
| YUWERA          | F/44              | WT                 | WT                   |
| YUZOR           | M/73              | WT                 | WT                   |
| YUNUVO          | M/64              | WT                 | WT                   |

YUGEK

F/60

WT

WT

\* presence of mutations highlighted in red

**KRAS-variant 3'UTR T/G \***      **Dead of Disease**      **Length of Survival Post Tumor Removal**

|     |          |                               |
|-----|----------|-------------------------------|
| WT  |          |                               |
| T/G |          | 11.5 months (as of 8/13/2009) |
|     | 1/17/05  | 6 months                      |
| WT  | 6/1/04   | 41 months                     |
| WT  | 3/2/02   | 3 months                      |
| T/G |          |                               |
| WT  |          | 13.5 months (as of 8/13/09)   |
| T/G | 2/24/01  | 11 months                     |
| WT  |          |                               |
| WT  |          |                               |
| T/G |          | 37 months (as of 8/21/09)     |
| WT  |          | 13 months (as of 8/21/2009)   |
| WT  |          | 96 months (as of 8/21/2009)   |
| WT  | 6/20/02  | 4 months                      |
| T/G |          | 25 months (as of 8/21/2009)   |
| WT  | 12/12/07 | 19 months                     |
| WT  | 9/14/04  | 4 months                      |
| WT  |          | 33 months (as of 8/21/2009)   |
| WT  | 9/29/02  | 5 months                      |
| WT  |          | 12 months (as of 8/21/2009)   |
| WT  | 11/11/01 |                               |
| WT  | 1/7/05   | 6 months                      |
| WT  |          | 13 months (as of 8/21/2009)   |
|     |          | 17 months (as of 8/13/2009)   |
| T/G |          | 41 months (as of 8/13/2009)   |
| WT  | 8/3/01   | 1 month                       |
| T/G | 5/19/04  | 38 months                     |
| WT  |          |                               |
|     |          | 29 months (as of 8/13/2009)   |
| WT  |          | 3 months (as of 8/13/2009)    |
| WT  |          | 27 months (as of 8/13/2009)   |
| WT  | 1/25/05  | 2 weeks                       |
| WT  |          | 18 months (as of 8/13/2009)   |
|     |          | 8.5 months (as of 8/13/2009)  |
| T/G |          |                               |
| WT  |          |                               |
|     |          | 24 months (as of 8/21/2009)   |
| WT  |          | 14.5 months (as of 8/21/2009) |
| WT  |          | 29 months (as of 8/21/2009)   |
| WT  |          | 8 months (as of 8/13/2009)    |

WT

18.5 months (as of 8/13/2009)
